# Supplementary material for: Neurodevelopmental benefits of judo training in preschool children: a multinational, mixed methods follow-up study
Source: Frontiers journal article supplement (doi:10.3389/fpsyg.2024.1457515), 2024-12-18
Supplement: Data_Sheet_6.PDF [file Data_Sheet_6.PDF]

# Results

## Reliability Analysis

|                              | Mean | SD    | Cronbach's $\alpha$ | McDonald's $\omega$ |
|------------------------------|------|-------|---------------------|---------------------|
| Scale Reliability Statistics |      |       |                     |                     |
| scale                        | 5.19 | 0.630 | 0.954               | 0.959               |

[3]

|                                                                                                                           | Mean | SD    | Item-rest correlation | If item dropped     |                     |
|---------------------------------------------------------------------------------------------------------------------------|------|-------|-----------------------|---------------------|---------------------|
|                                                                                                                           |      |       |                       | Cronbach's $\alpha$ | McDonald's $\omega$ |
| Item Reliability Statistics                                                                                               |      |       |                       |                     |                     |
| Sits stable, stands straight maintains trunk control and balance, does not fall                                           | 5.66 | 0.835 | 0.537                 | 0.953               | 0.958               |
| Walks and runs easily, climbs stairs, skips, swings himself                                                               | 5.74 | 0.718 | 0.615                 | 0.953               | 0.958               |
| Efficiently uses small objects, without tremor, doesn't drop or spills liquid                                             | 5.49 | 0.915 | 0.708                 | 0.952               | 0.957               |
| Uses preferred hand consistently                                                                                          | 5.51 | 0.935 | 0.569                 | 0.953               | 0.958               |
| Lifts, pushes, pulls heavy objects, has strength                                                                          | 5.62 | 0.832 | 0.587                 | 0.953               | 0.958               |
| Regulates or grades force appropriate to task and objects                                                                 | 5.44 | 0.826 | 0.683                 | 0.952               | 0.957               |
| Grasp efficiently, does not drop                                                                                          | 5.57 | 0.754 | 0.696                 | 0.952               | 0.957               |
| Persists during physical tasks without fatigue                                                                            | 5.15 | 0.950 | 0.563                 | 0.953               | 0.958               |
| Maintains a consistent and effective rate or tempo of performance throughout the entire task                              | 4.88 | 1.043 | 0.613                 | 0.953               | 0.958               |
| Calm—he is not hyperactive nor hypo active                                                                                | 4.67 | 1.446 | 0.379                 | 0.956               | 0.959               |
| In a task or activity chosen by the child-persists and completes the task, maintains focused attention, is not distracted | 5.19 | 0.973 | 0.566                 | 0.953               | 0.958               |
| In a task chosen by others—persists and completes the task, maintains focused attention, is not distracted                | 4.42 | 1.116 | 0.626                 | 0.953               | 0.958               |
| Selects and uses appropriate tools and materials for a task or activity                                                   | 5.50 | 0.805 | 0.840                 | 0.951               | 0.956               |
| Seeks for help, asks when uncertain, doesn't ask if not necessary                                                         | 5.12 | 0.929 | 0.621                 | 0.953               | 0.958               |
| Begins an activity easily and continues in sequentially and continuously                                                  | 4.84 | 0.992 | 0.762                 | 0.952               | 0.957               |
| Performs activity in the right sequence order                                                                             | 5.11 | 0.994 | 0.734                 | 0.952               | 0.957               |
| Completes activity or a task within the time guidelines (proc7)                                                           | 4.71 | 1.073 | 0.651                 | 0.952               | 0.958               |
| Looks for and locates objects in a logical manner (proc8)                                                                 | 5.39 | 0.844 | 0.735                 | 0.952               | 0.957               |
| Uses tools and materials in an orderly fashion                                                                            | 5.39 | 0.855 | 0.708                 | 0.952               | 0.957               |
| Gathers toys, put objects back in the right place                                                                         | 4.92 | 1.108 | 0.516                 | 0.953               | 0.959               |
| Modifies his movement and avoids knocking over or bumping into objects                                                    | 5.32 | 1.194 | 0.687                 | 0.952               | 0.958               |
| Tries to find solutions, shifts his action in accordance to circumstances                                                 | 5.23 | 0.853 | 0.795                 | 0.952               | 0.957               |
| Learns from his mistakes, willing to receive help                                                                         | 4.95 | 1.013 | 0.657                 | 0.952               | 0.958               |
| Adapts easily to changes and transitions                                                                                  | 4.66 | 1.213 | 0.453                 | 0.954               | 0.959               |
| Keeps the right distance from people doesn't touch them                                                                   | 5.12 | 1.088 | 0.268                 | 0.955               | 0.960               |
| Initiates eye contact                                                                                                     | 5.30 | 1.039 | 0.315                 | 0.955               | 0.960               |
| Uses common gesture and expressions for communication                                                                     | 5.56 | 0.849 | 0.779                 | 0.952               | 0.957               |

|                                                                                                                            | Mean | SD    | Item-rest correlation | If item dropped     |                     |
|----------------------------------------------------------------------------------------------------------------------------|------|-------|-----------------------|---------------------|---------------------|
|                                                                                                                            |      |       |                       | Cronbach's $\alpha$ | McDonald's $\omega$ |
| <b>Produce clear understandable speech, has no articulation disruptions</b>                                                | 5.15 | 1.272 | 0.629                 | 0.953               | 0.958               |
| <b>Uses appropriate volume and inflection in speech according to situation</b>                                             | 5.16 | 0.982 | 0.611                 | 0.953               | 0.958               |
| <b>Expresses himself easily, speaks properly and directly expresses desires and requests, is able to give descriptions</b> | 5.29 | 1.055 | 0.718                 | 0.952               | 0.957               |
| <b>Conforms, respects rules at home and school</b>                                                                         | 4.93 | 1.016 | 0.634                 | 0.953               | 0.958               |
| <b>Acts politely, asks for permission, awaits his turn</b>                                                                 | 5.00 | 1.046 | 0.597                 | 0.953               | 0.958               |
| <b>Negotiates, resolves conflicts, collaborates with peers, is not obnoxious</b>                                           | 5.16 | 1.047 | 0.576                 | 0.953               | 0.958               |
| <b>Respects, relates and helps others</b>                                                                                  | 5.26 | 0.945 | 0.585                 | 0.953               | 0.958               |

## References

- [1] The jamovi project (2024). *jamovi*. (Version 2.6) [Computer Software]. Retrieved from <https://www.jamovi.org>.
- [2] R Core Team (2024). *R: A Language and environment for statistical computing*. (Version 4.4) [Computer software]. Retrieved from <https://cran.r-project.org>. (R packages retrieved from CRAN snapshot 2024-08-07).
- [3] Revelle, W. (2023). *psych: Procedures for Psychological, Psychometric, and Personality Research*. [R package]. Retrieved from <https://cran.r-project.org/package=psych>.
